# Supplementary material for: Investigation of Bufavirus and Parvovirus 4 in Patients with Gastro-Enteritis from the South-East of France
Source: MDPI journal article supplement (doi:10.3390/pathogens10091151), 2021-09-07
Supplement: s1 [file s1]

**Table S1.** BuV viral load in diarrheic stools samples (cohort 2).

| N. | Sex* | Age | BuV viral load**                                         | BuV viral load*** (Liquid samples) | Sampling month |
|----|------|-----|----------------------------------------------------------|------------------------------------|----------------|
| 1  | M    | 44  | $4.96 \times 10^3$                                       | –                                  | Nov. 2020      |
| 2  | M    | 55  | $8.78 \times 10^3$                                       | –                                  | Apr. 2021      |
| 3  | M    | 49  | $9.61 \times 10^3$                                       | –                                  | Dec. 2020      |
| 4  | M    | 74  | $9.86 \times 10^3$                                       | –                                  | Mar. 2021      |
| 5  | F    | 56  | $1.01 \times 10^4$                                       | –                                  | Feb. 2021      |
| 6  | M    | 46  | $1.06 \times 10^4$                                       | –                                  | Apr. 2021      |
| 7  | F    | 70  | $1.16 \times 10^4$                                       | –                                  | Nov. 2020      |
| 8  | M    | 50  | $1.18 \times 10^4$                                       | –                                  | Nov. 2020      |
| 9  | M    | 61  | $1.27 \times 10^4$                                       | –                                  | Dec. 2020      |
| 10 | M    | 69  | $1.28 \times 10^4$                                       | –                                  | Nov. 2020      |
| 11 | M    | 34  | (Day1) $1.92 \times 10^4$<br>(Day5) $1.39 \times 10^4$   | –<br>–                             | Apr. 2021      |
| 12 | F    | 51  | $2.34 \times 10^4$                                       | –                                  | Mar. 2021      |
| 13 | M    | 33  | $2.34 \times 10^4$                                       | –                                  | Apr. 2021      |
| 14 | M    | 30  | (Day 1) $2.77 \times 10^4$<br>(Day 5) $4.81 \times 10^4$ | –<br>–                             | Feb. 2021      |
| 15 | M    | 74  | $3.27 \times 10^4$                                       | –                                  | Feb. 2021      |
| 16 | F    | 49  | (Day1) $4.87 \times 10^4$<br>(Day1) $8.24 \times 10^4$   | –<br>–                             | Jan. 2021      |
| 17 | M    | 71  | $6.63 \times 10^4$                                       | –                                  | Dec. 2020      |
| 18 | M    | 66  | (Day 1)<br>$8.09 \times 10^4$                            | (Day 9) $1.35 \times 10^7$         | Dec. 2020      |
| 19 | M    | 72  | $8.30 \times 10^4$                                       | –                                  | Nov. 2020      |
| 20 | M    | 60  | $1.44 \times 10^5$                                       | –                                  | Apr. 2021      |
| 21 | M    | 68  | $3.92 \times 10^5$                                       | –                                  | Dec. 2020      |
| 22 | M    | 70  | (Day 7)<br>$4.57 \times 10^5$                            | (Day 1) $2.95 \times 10^7$         | Jan. 2021      |
| 23 | M    | 57  | –                                                        | $1.41 \times 10^6$                 | Feb. 2021      |
| 24 | F    | 60  | –                                                        | $1.47 \times 10^6$                 | Mar. 2021      |
| 25 | M    | 67  | –                                                        | $1.60 \times 10^6$                 | Jan. 2021      |
| 26 | M    | 63  | –                                                        | $1.67 \times 10^6$                 | Nov. 2020      |
| 27 | M    | 46  | –                                                        | $2.13 \times 10^6$                 | Feb. 2021      |
| 28 | M    | 75  | –                                                        | $2.99 \times 10^6$                 | Dec. 2020      |

\*M = male; F = female; \*\* = genome copies per gram of stool; \*\*\* = genome copies per mL of stool.

**Table S2.** BuV viral load in non-diarrheic stools samples (cohort 2).

| N. | Sex* | Age | BuV Viral Load**                                         | Sampling Month |
|----|------|-----|----------------------------------------------------------|----------------|
| 1  | F    | 53  | $8.03 \times 10^3$                                       | Nov. 2020      |
| 2  | M    | 71  | $8.78 \times 10^3$                                       | Feb. 2021      |
| 3  | M    | 62  | $9.31 \times 10^3$                                       | Mar. 2021      |
| 4  | M    | 55  | $9.37 \times 10^3$                                       | Apr. 2021      |
| 5  | F    | 68  | $1.46 \times 10^4$                                       | Mar. 2021      |
| 6  | F    | 74  | $1.56 \times 10^4$                                       | Dec. 2020      |
| 7  | F    | 48  | $1.57 \times 10^4$                                       | Apr. 2021      |
| 8  | F    | 41  | $1.65 \times 10^4$                                       | Dec. 2020      |
| 9  | M    | 61  | $1.86 \times 10^4$                                       | Dec. 2020      |
| 10 | M    | 66  | $2.00 \times 10^4$                                       | Apr. 2021      |
| 11 | M    | 43  | $2.70 \times 10^4$                                       | Feb. 2021      |
| 12 | M    | 68  | $2.82 \times 10^4$                                       | Apr. 2021      |
| 13 | M    | 33  | (Day 1) $5.76 \times 10^4$<br>(Day 5) $2.86 \times 10^4$ | Mar. 2021      |

|    |   |    |                    |           |
|----|---|----|--------------------|-----------|
| 14 | M | 48 | $3.53 \times 10^4$ | Mar. 2021 |
| 15 | M | 44 | $4.78 \times 10^4$ | Nov. 2020 |
| 16 | M | 72 | $1.99 \times 10^5$ | Nov. 2020 |
| 17 | F | 69 | $2.41 \times 10^5$ | Feb. 2021 |

\*M = male; F=female; \*\* = genome copies per gram of stool.

**Table S3.** Real-time PCR assay used for genotyping BuV-DNA positive samples.

| Primers and Probe | Sequence                        | Position*  | PCR Product Size (bp) |
|-------------------|---------------------------------|------------|-----------------------|
| BuV1_Fw           | GCAGACTTCCAACAACAACTAACAAC      | 315 8–3180 | 102 <sup>a</sup>      |
| BuV1_Rev          | GCCTTGTTTGCTTACTGTTTTG          | 325 9–3280 |                       |
| BuV1_Probe        | GCAGAGAAGTCACACTAGAACACCTCGACC  | 318 6–3215 |                       |
| BuV2_Fw           | TGAACACATGACAGGAC               | 398 7–4003 | 124 <sup>b</sup>      |
| BuV2_Rev          | GTATGGTCCAAATGTGTT              | 411 0–4127 |                       |
| BuV2_Probe        | CAATCAGAACTAAACGACCACATTC       | 403 3–4057 |                       |
| BuV3_Fw           | GCACAACAAACAGGMCAAACAA          | 399 4–4015 | 114 <sup>c</sup>      |
| BuV3_Rev          | GAATGTGTTGTGGTAGTCTTGTG         | 410 7–4129 |                       |
| BuV3_Probe        | TGCACACCAATCAGAACTCAGAAATGCMACA | 403 2–4062 |                       |

\* = positions by reference to sequences quoted in the next column; a = NC\_038544.1 Bufavirus 1 strain BF.86 NS1; b = JX027297 bufavirus-2 strain BF.39; c = NC\_024888 Bufavirus-3 strain: BTN-63.
